# Supplementary material for: Dibenzylammonium trichloroacetate: an above-room-temperature order–disorder switchable dielectric material
Source: Royal Society of Chemistry journal article supplement (doi:10.1039/c6ce00194g), 2016-01-01
Supplement: c6ce00194g1.pdf [file c6ce00194g1.pdf]

## Supplementary Information

# Dibenzylammonium trichloroacetate: An above-room-temperature order-disorder switchable dielectric material

Siyuan Zeng,<sup>[a]</sup> Zhihua Sun,<sup>[b]</sup> Chengmin Ji,<sup>[b]</sup> Shuquan Zhang,<sup>[b]</sup> Cheng Song,<sup>\*[a]</sup> and Junhua Luo<sup>\*[b]</sup>

<sup>a</sup>College of Chemistry and Chemical Engineering, Jiangxi Normal University, Nanchang, Jiangxi 330022, PR China

<sup>b</sup>Key Laboratory of Optoelectronic Materials Chemistry and Physics, Fujian Institute of Research on the Structure of Matter, Chinese Academy of Sciences, Fuzhou, Fujian 350002, PR China

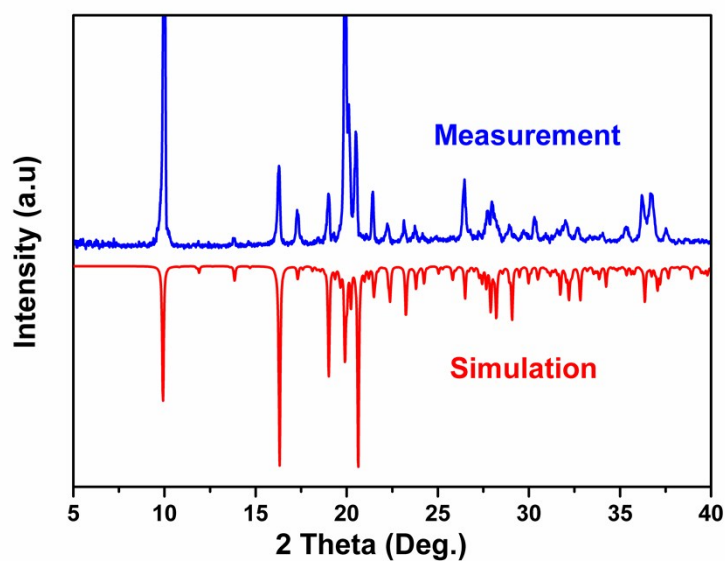

**Figure S1.** Experimental and calculated PXRD patterns of 1.

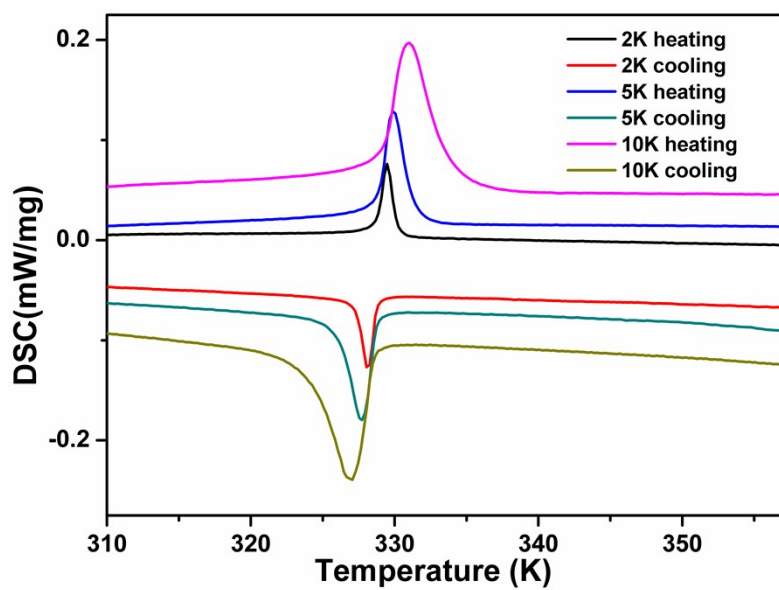

**Figure S2.** The DSC curves of 1 with different heating rate 10 K/min, 5 K/min, 2 K/min.

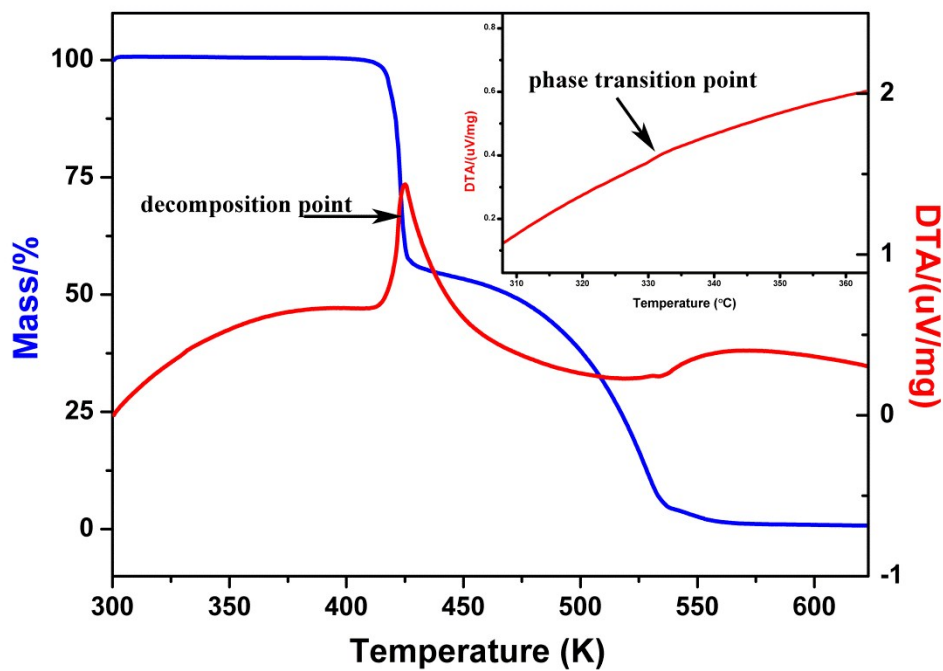

**Figure S3.** The TG/DTA curves of 1 with heating rate 10 K/min.

**Table S1.** Crystal data and structural refinement for **1** at different temperatures.

| Temperature (K)                                                             | 293K                                                                              | 310K                                                                              | 315K                                                                              | 320K                                                                              |
|-----------------------------------------------------------------------------|-----------------------------------------------------------------------------------|-----------------------------------------------------------------------------------|-----------------------------------------------------------------------------------|-----------------------------------------------------------------------------------|
| Radiation type                                                              | Mo                                                                                | Cu                                                                                | Cu                                                                                | Cu                                                                                |
| Empirical formula                                                           | C <sub>24</sub> H <sub>24</sub> Cl <sub>4.5</sub> N <sub>1.5</sub> O <sub>3</sub> | C <sub>24</sub> H <sub>24</sub> Cl <sub>4.5</sub> N <sub>1.5</sub> O <sub>3</sub> | C <sub>24</sub> H <sub>24</sub> Cl <sub>4.5</sub> N <sub>1.5</sub> O <sub>3</sub> | C <sub>24</sub> H <sub>24</sub> Cl <sub>4.5</sub> N <sub>1.5</sub> O <sub>3</sub> |
| Crystal system                                                              | Orthorhombic                                                                      | Orthorhombic                                                                      | Orthorhombic                                                                      | Orthorhombic                                                                      |
| Space group                                                                 | <i>Pnma</i>                                                                       | <i>Pnma</i>                                                                       | <i>Pnma</i>                                                                       | <i>Pnma</i>                                                                       |
| <i>a</i> (Å)                                                                | 27.9771(10)                                                                       | 28.2608(3)                                                                        | 28.2714(3)                                                                        | 28.2869(4)                                                                        |
| <i>b</i> (Å)                                                                | 17.8261(7)                                                                        | 17.9257(3)                                                                        | 17.9408(2)                                                                        | 17.9428(3)                                                                        |
| <i>c</i> (Å)                                                                | 10.0751(3)                                                                        | 10.23480(10)                                                                      | 10.24460(10)                                                                      | 10.25130(10)                                                                      |
| <i>V</i> (Å) <sup>3</sup>                                                   | 5024.7(3)                                                                         | 5184.89(11)                                                                       | 5196.18(9)                                                                        | 5203.01(12)                                                                       |
| $\beta$ (deg.)                                                              | 90                                                                                | 90                                                                                | 90                                                                                | 90                                                                                |
| <i>Z</i>                                                                    | 8                                                                                 | 8                                                                                 | 8                                                                                 | 8                                                                                 |
| Calculated density (g cm <sup>-3</sup> )                                    | 1.430                                                                             | 1.385                                                                             | 1.382                                                                             | 1.381                                                                             |
| Absorption coefficient (mm <sup>-1</sup> )                                  | 0.552                                                                             | 4.835                                                                             | 4.831                                                                             | 4.832                                                                             |
| <i>F</i> (000)                                                              | 2232                                                                              | 2230                                                                              | 2231                                                                              | 2232                                                                              |
| Theta range for data                                                        | 2.71 to 26.37                                                                     | 3.98 to 66.60                                                                     | 3.98 to 66.59                                                                     | 3.12 to 66.58                                                                     |
| Index ranges                                                                | -23 ≤ <i>h</i> ≤ 34<br>-22 ≤ <i>k</i> ≤ 21<br>-12 ≤ <i>l</i> ≤ 12                 | -33 ≤ <i>h</i> ≤ 21<br>-21 ≤ <i>k</i> ≤ 20<br>-8 ≤ <i>l</i> ≤ 12                  | -27 ≤ <i>h</i> ≤ 33<br>-21 ≤ <i>k</i> ≤ 21<br>-12 ≤ <i>l</i> ≤ 12                 | -33 ≤ <i>h</i> ≤ 21<br>-21 ≤ <i>k</i> ≤ 19<br>-12 ≤ <i>l</i> ≤ 11                 |
| Reflections collected                                                       | 16412 / 5280                                                                      | 14382 / 4693                                                                      | 27392 / 4744                                                                      | 12575 / 4755                                                                      |
| GOF                                                                         | 1.024                                                                             | 1.065                                                                             | 1.060                                                                             | 1.077                                                                             |
| <i>R</i> <sub>1</sub> , <i>wR</i> <sub>2</sub> [ <i>I</i> > 2σ( <i>I</i> )] | 0.0400, 0.0932                                                                    | 0.0743, 0.2093                                                                    | 0.0775, 0.2158                                                                    | 0.0850, 0.2402                                                                    |
| <i>R</i> <sub>1</sub> , <i>wR</i> <sub>2</sub> [all data]                   | 0.0565, 0.1030                                                                    | 0.0894, 0.2332                                                                    | 0.0886, 0.2301                                                                    | 0.1013, 0.2619                                                                    |

**Table S2.** Atomic coordinates and equivalent isotropic displacement parameters ( $\text{\AA} \times 10^3$ ) for **1** at 293K.  $U(\text{eq})$  is defined as one third of the trace of the orthogonalized  $U_{ij}$  tensor.

|     | x         | y          | z         | $U(\text{eq})$ |
|-----|-----------|------------|-----------|----------------|
| C11 | 7806 (3)  | 4457       | 3058 (7)  | 44.5 (2)       |
| C12 | 10248 (3) | 5888 (4)   | 3423 (7)  | 72.8 (2)       |
| O1  | 8062 (7)  | 4457       | 5934 (2)  | 44.9 (5)       |
| O2  | 10275 (7) | 4457       | 6076 (18) | 40.7 (5)       |
| N1  | 18426 (7) | 13370      | 1279 (2)  | 28.9 (5)       |
| C23 | 9352 (9)  | 4457       | 3914 (3)  | 28.3 (6)       |
| C22 | 9205 (9)  | 4457       | 5477 (3)  | 27.9 (6)       |
| C2  | 18457 (7) | 10887 (12) | 1339 (2)  | 35.0 (5)       |
| C3  | 17571 (7) | 10291 (13) | 450 (2)   | 40.3 (5)       |
| C1  | 19203 (7) | 12133 (12) | 974 (2)   | 39.6 (5)       |
| C5  | 17186 (8) | 8500 (13)  | 1982 (2)  | 48.1 (6)       |
| C7  | 18682 (8) | 10278 (12) | 2560 (2)  | 42.1 (5)       |
| C4  | 16945 (8) | 9104 (13)  | 773 (2)   | 45.6 (5)       |
| C6  | 18046 (9) | 9092 (13)  | 2878 (2)  | 47.8 (6)       |

**Table S3.** Selected bond lengths ( $\text{\AA}$ ) and angles ( $^\circ$ ) for N-IPBADC at 293K.

|                          |             |                           |             |         |           |
|--------------------------|-------------|---------------------------|-------------|---------|-----------|
| C11—C23                  | 1.768 (3)   | C7—C6                     | 1.382 (3)   | C23—C22 | 1.569 (4) |
| C12—C23                  | 1.7589 (16) | C2—C7                     | 1.383 (3)   | N1—C1   | 1.492 (2) |
| O1—C22                   | 1.232 (3)   | C2—C3                     | 1.389 (3)   | C5—C4   | 1.373 (3) |
| O2—C22                   | 1.227 (3)   | C2—C1                     | 1.498 (3)   | C5—C6   | 1.376 (3) |
| C3—C4                    | 1.380 (3)   |                           |             |         |           |
| C4—C3—C2                 | 120.6 (2)   | C5—C6—C7                  | 120.5 (2)   |         |           |
| C1—N1—C1 <sup>ii</sup>   | 112.0 (2)   | N1—C1—C2                  | 112.38 (16) |         |           |
| O2—C22—O1                | 128.9 (3)   | C4—C5—C6                  | 119.6 (2)   |         |           |
| O2—C22—C23               | 113.9 (2)   | C6—C7—C2                  | 120.4 (2)   |         |           |
| O1—C22—C23               | 117.2 (2)   | C7—C2—C3                  | 118.7 (2)   |         |           |
| C5—C4—C3                 | 120.3 (2)   | C7—C2—C1                  | 120.02 (19) |         |           |
| C22—C23—C12 <sup>i</sup> | 109.02 (11) | C3—C2—C1                  | 121.28 (19) |         |           |
| C12—C23—C12 <sup>i</sup> | 108.98 (15) | C12—C23—C11               | 108.08 (10) |         |           |
| C22—C23—C11              | 113.59 (18) | C12 <sup>i</sup> —C23—C11 | 108.08 (10) |         |           |
| C22—C23—C12              | 109.02 (11) |                           |             |         |           |

**Table S4.** Equivalent isotropic displacement parameters ( $\text{\AA}^2 \times 10^3$ ) for the chlorine of **1** at different temperatures.  $U(\text{eq})$  is defined as one third of the trace of the orthogonalized  $U_{ij}$  tensor.

| Atom  | $U(\text{eq})$ |           |           |        |
|-------|----------------|-----------|-----------|--------|
|       | 293 K          | 310 K     | 315 K     | 320 K  |
| Cl(1) | 44.5(2)        | 147.8(13) | 162(12)   | 200(2) |
| Cl(2) | 72.8(2)        | 127.2(2)  | 144.8(16) | 260(2) |
